# Supplementary material
Source: PubMed Central journal article supplement (PMC3759543)
Supplement: NIHMS484866-supplement-01.pdf [file NIHMS484866-supplement-01.pdf]

**Table S1** – Summary of all multipoint LOD scores >1.0.

| <b>Chr</b> | <b>Temperament or Diagnosis</b> | <b>Position (cM / Mb)</b> | <b>LOD</b> |
|------------|---------------------------------|---------------------------|------------|
| 1q32       | Hyperthymic                     | 199 / 199.8               | 1.83       |
| 1p36       | BD + MDD                        | 20 / 11.5                 | 1.72       |
| 1q42       | Hyperthymic                     | 256 / 238.5               | 2.00       |
| 1q42       | Cyclothymic                     | 259 / 239.8               | 1.14       |
| 1q42       | Hyperthymic                     | 271 / 244.5               | 2.57*      |
| 2p25       | Irritable                       | 26 / 10.1                 | 1.34       |
| 2p25       | BD + MDD                        | 29 / 11.4                 | 1.12       |
| 2p22       | Irritable                       | 60 / 36.3                 | 1.73       |
| 2p16       | Hyperthymic                     | 77 / 51.8                 | 2.84*      |
| 2p15       | Irritable                       | 84 / 61.9                 | 1.46       |
| 2p14       | Hyperthymic                     | 90 / 67.4                 | 1.59       |
| 2q31       | Dysthymic                       | 179 / 173.0               | 1.56       |
| 3p21       | Dysthymic                       | 70 / 46.9                 | 2.74*      |
| 4p16       | BD + MDD                        | 12 / 6.3                  | 1.05       |
| 4q31       | BD + MDD                        | 146 / 153.3               | 1.18       |
| 4q34       | Cyclothymic                     | 170 / 175.9               | 1.13       |
| 5p15       | Hyperthymic                     | 17 / 6.3                  | 1.86       |
| 5q31       | Hyperthymic                     | 144 / 142.5               | 1.34       |
| 6q16       | Hyperthymic                     | 103 / 98.4                | 2.83*      |
| 6q22       | Anxious                         | 118 / 116.0               | 1.71       |
| 6q23       | Dysthymic                       | 137 / 136.6               | 1.23       |
| 6q24       | Irritable                       | 147 / 145.0               | 2.33*      |
| 6q27       | Hyperthymic                     | 183 / 167.2               | 1.47       |
| 7q22       | Dysthymic                       | 111 / 101.1               | 1.89       |
| 7q22       | Cyclothymic                     | 112 / 102.4               | 1.44       |
| 7q32       | Cyclothymic                     | 134 / 130.6               | 1.16       |
| 8p23       | Hyperthymic                     | 10 / 4.7                  | 1.17       |
| 8q12       | Dysthymic                       | 67 / 55.1                 | 1.98       |
| 9q21       | Anxious                         | 66 / 71.2                 | 1.45       |
| 9q31       | BD                              | 103 / 102.5               | 2.20*      |
| 10p15      | Dysthymic                       | 5 / 2.2                   | 1.18       |
| 10p13      | Hyperthymic                     | 30 / 12.3                 | 1.85       |
| 10q25      | BD                              | 131 / 115.2               | 1.81       |
| 10q25      | BD + MDD                        | 131 / 115.2               | 1.18       |
| 11q25      | Hyperthymic                     | 148 / 131.7               | 1.80       |
| 13q31      | Anxious                         | 76 / 79.8                 | 1.10       |
| 13q33      | Cyclothymic                     | 91 / 101.1                | 1.26       |

|       |             |             |       |
|-------|-------------|-------------|-------|
| 13q34 | Dysthymic   | 124 / 111.8 | 2.39* |
| 13q34 | BD          | 119 / 109.9 | 1.09  |
| 14q23 | Hyperthymic | 61 / 61.0   | 2.61* |
| 15q15 | Hyperthymic | 42 / 38.0   | 1.66  |
| 16p13 | Dysthymic   | 36 / 15.6   | 1.10  |
| 16q21 | BD          | 83 / 63.5   | 1.40  |
| 16q21 | BD + MDD    | 83 / 63.5   | 1.40  |
| 16q23 | Dysthymic   | 107 / 80.8  | 2.07  |
| 17p13 | Dysthymic   | 21 / 7.7    | 1.79  |
| 18q12 | Cyclothymic | 59 / 33.5   | 1.40  |
| 19q13 | BD + MDD    | 67 / 45.2   | 2.42* |
| 22q11 | BD          | 6 / 17.0    | 2.77* |
| 22q12 | BD + MDD    | 26 / 25.3   | 1.18  |
| Xp11  | Irritable   | 70 / 45.0   | 1.55  |
| Xq21  | BD + MDD    | 97 / 95.3   | 1.15  |
| Xq25  | BD + MDD    | 129 / 124.2 | 1.25  |

Note: The peak LOD score within 20 cM is shown. An \* indicates that the peak meets genome-wide suggestive criteria.

**Table S2** – Summary of all two-point LOD scores >1.0.

| Chr  | SNP        | Position (cM / Mb) | Hyperthymic | Dysthymic | Cyclothymic | Irritable | Anxious | BD   | BD+MDD |
|------|------------|--------------------|-------------|-----------|-------------|-----------|---------|------|--------|
| 1p36 | rs630075   | 15.5 / 9.3         |             | 1.70      | 1.92        |           | 1.94*   | 1.10 | 1.49   |
| 1q21 | rs756303   | 146.5 / 151.2      |             |           |             |           | 2.22*   |      |        |
| 1q21 | rs7345     | 147.0 / 151.9      |             | 3.46*     | 1.47        |           |         |      |        |
| 1q25 | rs929126   | 176.5 / 173.3      |             | 2.62*     |             | 1.29      |         |      |        |
| 1q32 | rs1204682  | 210.0 / 206.1      |             | 3.45*     | 1.61        |           |         |      |        |
| 1q32 | rs1781014  | 210.6 / 206.5      |             | 2.62*     |             |           |         |      |        |
| 1q41 | rs10494988 | 219.2 / 213.2      |             |           | 3.04*       | 1.33      |         |      |        |
| 1q44 | rs4658690  | 268.0 / 243.3      |             | 1.74      | 2.98*       |           | 1.03    |      |        |
| 2p24 | rs956596   | 33.4 / 12.9        |             |           |             | 2.87*     |         |      |        |
| 2p24 | rs779343   | 33.4 / 13.0        |             |           |             | 2.62*     |         |      |        |
| 2p22 | rs1990838  | 57.9 / 34.3        |             | 2.43*     |             | 4.22*     |         |      |        |
| 2p22 | rs163077   | 63.1 / 38.1        |             |           |             | 3.32*     |         | 1.25 |        |
| 2p22 | rs170815   | 63.3 / 38.3        | 1.05        |           |             | 2.56*     |         |      |        |
| 2p22 | rs929642   | 64.9 / 40.2        | 1.21        | 2.27      | 1.57        | 3.14*     | 1.65    | 1.56 |        |
| 2p21 | rs1560260  | 65.7 / 41.7        |             | 2.31      |             | 2.70*     |         |      |        |
| 2p21 | rs896986   | 69.1 / 44.2        |             |           |             | 2.44*     |         |      |        |
| 2p15 | rs1177264  | 84.0 / 61.2        |             |           |             | 2.46*     |         |      |        |
| 3p24 | rs1494225  | 43.5 / 22.4        |             |           |             | 2.63*     |         |      |        |
| 3p22 | rs1976146  | 60.2 / 34.8        |             | 2.78*     |             |           |         |      |        |
| 3p14 | rs536036   | 78.4 / 57.3        |             | 2.70*     | 1.01        |           |         |      |        |
| 3p14 | rs6790592  | 87.0 / 63.4        |             | 2.64*     |             |           |         |      |        |
| 4q35 | rs2045405  | 183.4 / 183.6      |             | 2.47*     |             | 1.20      |         |      |        |
| 4q35 | rs1564986  | 192.5 / 186.2      |             | 2.64*     |             |           |         |      |        |
| 5q11 | rs292973   | 74.6 / 58.0        |             |           | 2.41*       |           |         |      |        |
| 5q23 | rs1478419  | 127.3 / 123.0      |             |           |             | 2.42*     |         |      |        |

|      |           |               |      |       |       |       |      |       |
|------|-----------|---------------|------|-------|-------|-------|------|-------|
| 5q34 | rs923467  | 165.0 / 160.4 |      | 2.68* |       |       |      |       |
| 5q34 | rs9313868 | 165.0 / 160.4 |      | 2.99* |       |       |      |       |
| 6p21 | rs1003979 | 52.5 / 33.2   |      | 1.16  |       | 2.33* |      |       |
| 6p21 | rs1563788 | 66.2 / 43.4   |      | 1.30  |       | 2.79* |      |       |
| 6q12 | rs1016461 | 83.4 / 69.1   | 1.13 |       |       | 2.56* |      |       |
| 6q15 | rs6940716 | 93.4 / 88.2   |      |       | 2.41* |       |      | 1.30  |
| 6q21 | rs1565528 | 117.6 / 113.8 |      | 3.14* |       | 1.41  | 1.27 |       |
| 6q22 | rs1415428 | 117.8 / 114.8 |      | 1.56  | 2.72* |       |      |       |
| 6q23 | rs942150  | 130.7 / 131.7 |      |       | 2.67* |       |      |       |
| 6q23 | rs969282  | 133.0 / 134.2 |      |       |       | 2.83* |      |       |
| 6q23 | rs999638  | 140.4 / 138.1 |      | 1.51  | 2.87* | 3.13* |      |       |
| 6q24 | rs1358716 | 143.6 / 139.5 |      |       | 2.19  | 2.98* |      |       |
| 6q24 | rs1977739 | 144.7 / 140.3 |      |       | 2.50* | 1.73  |      |       |
| 6q24 | rs225604  | 145.4 / 142.5 |      | 2.39* | 2.19  | 1.19  |      |       |
| 6q24 | rs1832378 | 147.4 / 145.7 |      | 3.02* | 3.27* |       |      |       |
| 6q24 | rs6570858 | 150.6 / 148.9 |      |       | 3.41* |       |      |       |
| 6q25 | rs602890  | 166.6 / 158.0 |      | 3.46* | 1.54  |       | 1.01 |       |
| 6q25 | rs923459  | 168.8 / 159.5 |      | 3.54* |       | 1.10  | 1.32 |       |
| 6q27 | rs942731  | 176.6 / 164.6 |      |       |       | 1.36  |      | 2.33* |
| 6q27 | rs491253  | 178.2 / 165.7 |      | 1.49  | 2.91* | 1.22  |      | 1.71  |
| 6q27 | rs3002430 | 179.4 / 166.2 |      |       | 2.42* |       |      | 1.20  |
| 7p14 | rs2049758 | 53.4 / 33.0   |      | 2.92* | 1.17  |       |      |       |
| 7p14 | rs724291  | 53.9 / 33.8   |      | 2.39* |       |       |      |       |
| 7p14 | rs2007664 | 59.1 / 38.0   |      | 2.67* |       |       |      |       |
| 7p14 | rs722790  | 62.3 / 41.0   |      | 2.43* |       |       |      |       |
| 7q21 | rs1326152 | 105.6 / 94.3  |      | 1.84  | 2.53* |       |      |       |
| 7q22 | rs257376  | 116.8 / 106.6 |      | 2.40* | 1.53  |       |      |       |
| 8q12 | rs1437785 | 67.5 / 55.8   |      | 3.94* | 1.37  |       |      |       |

|       |            |               |       |       |       |      |       |
|-------|------------|---------------|-------|-------|-------|------|-------|
| 11q22 | rs723513   | 101.0 / 97.6  |       | 2.14  | 2.54* |      |       |
| 11q22 | rs2848479  | 101.0 / 97.6  |       | 2.14  | 2.54* |      |       |
| 13q22 | rs9573506  | 71.3 / 74.7   | 2.49* |       |       |      |       |
| 13q31 | rs768218   | 77.2 / 81.2   | 2.36* | 1.14  |       |      |       |
| 13q33 | rs536863   | 97.8 / 101.6  |       | 2.58* | 1.08  | 1.50 | 1.27  |
| 13q33 | rs53248    | 108.7 / 106.3 |       |       | 2.51* |      |       |
| 13q34 | rs726455   | 123.5 / 11.7  | 2.45* |       |       |      |       |
| 13q34 | rs204218   | 125.0 / 112.1 | 2.52* |       |       |      |       |
| 13q34 | rs1885688  | 127.5 / 112.9 |       |       |       |      |       |
| 13q34 | rs12856863 | 127.8 / 113.1 | 1.10  | 2.27  |       |      |       |
| 14q24 | rs760267   | 76.7 / 76.4   | 2.62* |       |       |      |       |
| 16q23 | rs1074964  | 95.5 / 76.7   |       | 3.04* |       |      |       |
| 16q23 | rs1079638  | 96.2 / 77.5   |       | 3.48* | 1.19  |      |       |
| 16q23 | rs1424189  | 111.1 / 81.9  | 3.00* |       |       |      |       |
| 17q25 | rs1872076  | 108.9 / 69.0  | 2.45* | 2.29* |       |      |       |
| 17q25 | rs10931    | 131.2 / 76.1  |       | 3.41* |       | 1.72 |       |
| 17q25 | rs734338   | 132.1 / 76.4  | 3.05* | 3.02* |       |      |       |
| 18q11 | rs1972602  | 45.8 / 20.4   | 3.30* |       |       |      |       |
| 18q12 | rs650680   | 58.3 / 33.2   |       | 2.51* |       |      |       |
| 18q21 | rs545344   | 66.4 / 42.6   | 1.39  | 3.08* |       |      |       |
| 18q21 | rs1434511  | 67.0 / 43.1   |       | 2.49* |       |      |       |
| 18q22 | rs593418   | 94.7 / 64.1   | 2.61* |       |       |      |       |
| 19q13 | rs566130   | 65.3 / 44.6   | 2.39* |       | 1.22  |      |       |
| 19q13 | rs440334   | 65.8 / 44.9   | 2.52* |       | 2.46* |      |       |
| 20p12 | rs1889188  | 30.8 / 10.1   | 2.54* |       |       |      |       |
| 20q13 | rs1407538  | 98.8 / 57.3   |       | 2.72* |       |      |       |
| 22q13 | rs714022   | 60.6 / 44.6   |       | 3.03* |       |      |       |
| Xp11  | rs1560514  | 79.2 / 57.4   |       |       |       |      | 2.17* |

|      |          |               |  |      |       |
|------|----------|---------------|--|------|-------|
| Xq21 | rs829290 | 97.7 / 96.1   |  | 1.08 | 2.23* |
| Xq23 | rs968859 | 110.2 / 112.3 |  |      | 2.02* |
| Xq23 | rs981780 | 110.3 / 112.3 |  |      | 1.96* |

An \* indicates that the peak meets genome-wide suggestive criteria.
